# Supplementary material
Source: publisher figshare collection journal article supplement (https://acs.figshare.com/ndownloader/files/3943831)
Supplement: Supplementary file 1 [file 3943831]

# Supporting Information (SI)

## Effect of Cellulose Nanowhiskers on Surface Morphology, Mechanical Properties and Cell Adhesion of Melt Drawn Polylactic Acid Fibers

*Kazi M. Zakir Hossain<sup>a</sup>, Muhammad S. Hasan<sup>b</sup>, Daniel Boyd<sup>b</sup>, Chris D. Rudd<sup>a</sup>, Ifty Ahmed<sup>a\*</sup> and Wim Thielemans<sup>c,d\*,+</sup>*

<sup>a</sup>Division of Materials, Mechanics and Structures, Faculty of Engineering, University of Nottingham, University Park, Nottingham NG7 2RD, United Kingdom

<sup>b</sup>Department of Applied Oral Sciences, Faculty of Dentistry, Dalhousie University, Halifax, NS, B3H 4R2, Canada

<sup>c</sup>School of Chemistry, University of Nottingham, University Park, Nottingham, NG7 2RD, United Kingdom

<sup>d</sup>Process and Environmental Research Division, Faculty of Engineering, University of Nottingham, University Park, Nottingham, NG7 2RD, United Kingdom

\*Corresponding authors: ifty.ahmed@nottingham.ac.uk, wim.thielemans@kuleuven.be

+Current address: KU Leuven, Kortrijk Campus, Etienne Sabbelaan 53, 8500 Kortrijk, Belgium

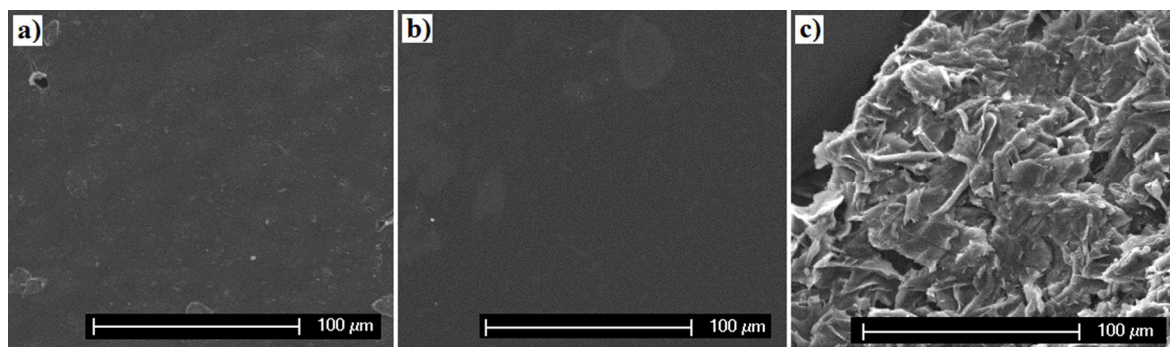

**SI 1.** SEM images showing the surfaces of coated PLA films: a) Solvent casted PLA films (control), b) PVAc coated PLA film, and c) CNWs (75 wt%)-PVAc coated PLA film.

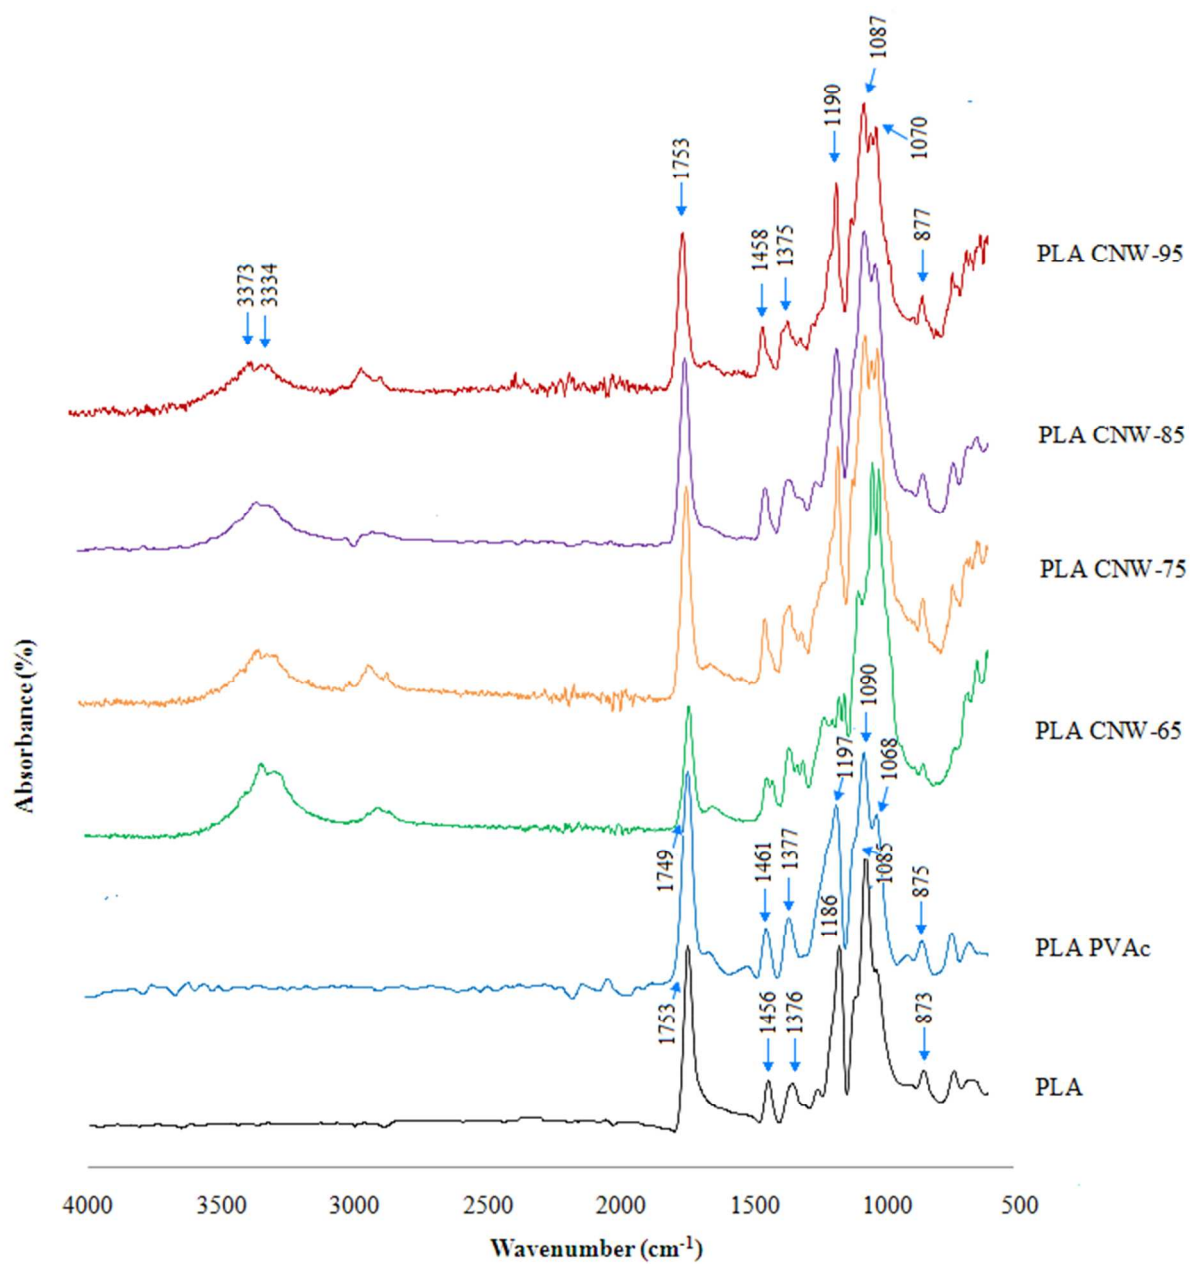

**SI 2.** FTIR-ATR spectrum for uncoated PLA and PVAc and CNWs-PVAc coated PLA fibers.

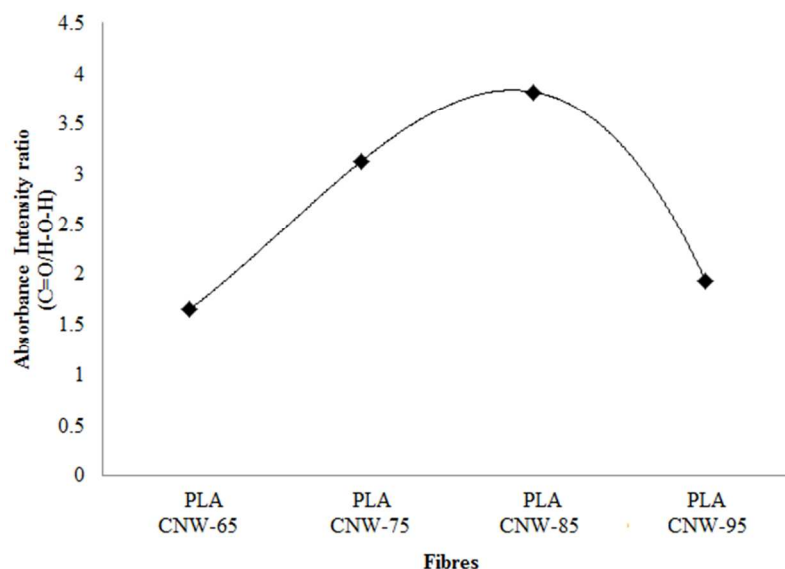

**SI 3.** FTIR-ATR absorbance intensity ratio of the C=O (of PLA) and H-O-H (of CNWs) of the CNWs-PVAc coated PLA fibers. The amount of coating substances on the PLA fibres were analyzed using the absorbance peak intensity of C=O group (at  $1753\text{ cm}^{-1}$ ) for the PLA and that of H-O-H group (at  $3373\text{ cm}^{-1}$ ) for the CNWs. The ratio of the peaks intensities increasing with the CNWs contents upto 85 wt%, which indicated that increasing amount of the CNWs attached on the fibre surface and further increase in CNWs reflects decreasing trend suggested the insufficient amount of coating substances on the fibre surface.

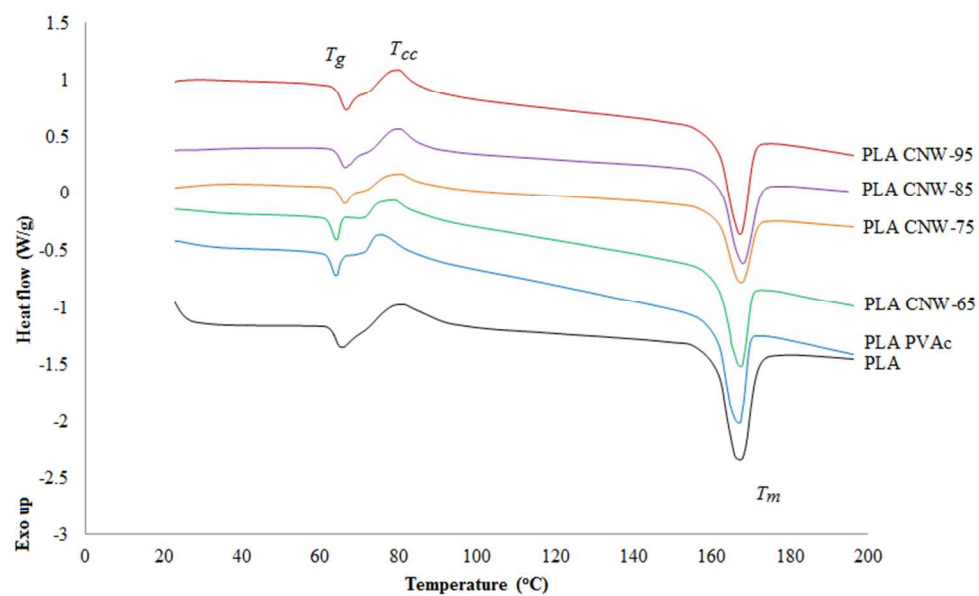

SI 4. DSC thermogram of uncoated and PVAc and CNWs-PVAc coated PLA fibers.

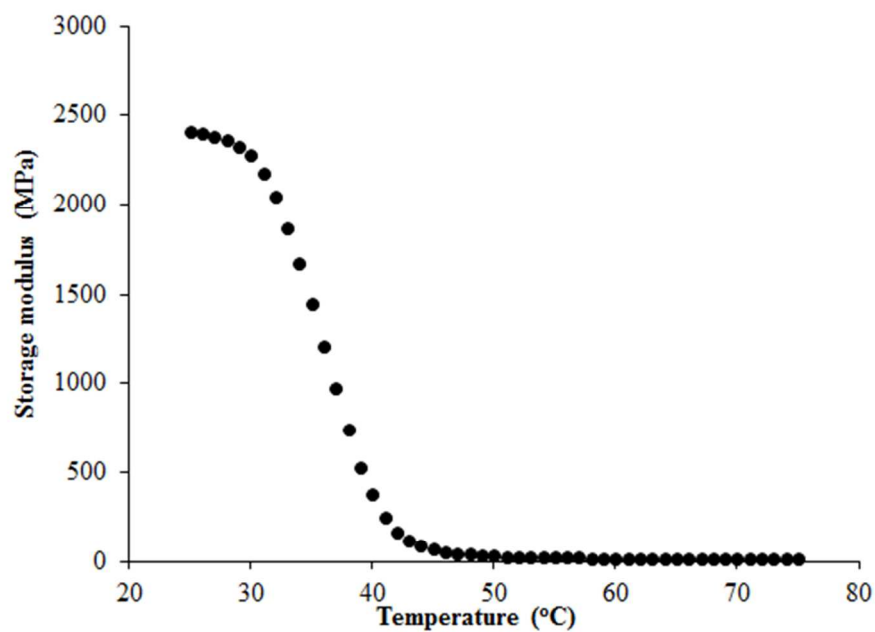

SI 5. Storage modulus curve of PVAc film obtained from dynamic mechanical analysis (DMA).
